# Supplementary material for: Head injury patterns in helmeted and non-helmeted cyclists admitted to a London Major Trauma Centre with serious head injury
Source: PLoS One. 2017 Sep 25;12(9):e0185367. doi: 10.1371/journal.pone.0185367 (PMC5612687; doi:10.1371/journal.pone.0185367)
Supplement: S1 Dataset — (XLSX) [file pone.0185367.s001.xlsx]

## Sheet: Sheet1
Age 16-25	Age 26-55	Age >55	Male	female	fall	car	4x4 or van	bus	HGV	stationary object	unclear/other	ped	wearing Helmet	no helmet	helmet not recorded	GCS at scene	EtOH+	EtOH -ve	EtOH not sent	Scalp lac	facial lac	Max Fax injury	contusion	SDH	EDH	SAH	Skull Fracture	Extracranial injury	no extracranial injury	Intracranial Injury	no Intracranial injury	dead
	1		1		0	0	0	0	0	0	1	0			1	14			1	0	1	1	0	1	0	0	1	1		1
	1		1		1	0	0	0	0	0	0	0	1			14			1	0	0	0	0	1	0	1	0	1	0	1	0
	1			1	1	0	0	0	0	0	0	0		1		15			1	0	0	0	1	0	1	0	0	1		1
	1		1		0	1	0	0	0	0	0	0		1		13			1	0	1	1	0	0	0	0	0	1			1
	1		1	0	0	0	1	0	0	0	0	0	1			7			1	1		1		1	0	1	1	1		1		1
	1		1		0	1	0	0	0	0	0	0		1		3			1	0	0	1	0	0	1	0	1	1		1
	1		1		0	1	0	0	0	0	0	0	1			14		1		0	1	0	1	0	0	0	0	1		1
	1		1		0	1	0	0	0	0	0	0			1	14	1			0	0	1	1	0	0	0	1	1		1
	1		1		0	1	0	0	0	0	0	0	1			14		1		0	0	0	0	0	0	0	0		1		1
	1		1		1	0	0	0	0	0	0	0	1			14			1	0	0	0	0	0	0	0	1	1			1
1			1		0	1	0	0	0	0	0	0		1		11		1		0	0	0	0	0	0	1	0	1		1
	1		1		0	1	0	0	0	0	0	0		1		15			1	1	0	0	0	1	0	1	1	1		1
		1	1		1	0	0	0	0	0	0	0		1		15		1		1	0	0	0	0	0	1	1	1		1
	1		1		0	0	0	0	0	0	1	0			1	14	1			0	1	1	0	0	0	0	0	1			1
	1		1		0	1	0	0	0	0	0	0		1		15			1	0	1	1	0	0	1	0	1	1		1
	1		1		0	0	0	1	0	0	0	0		1		14	1			1	0	0	0	1	0	0	0	1		1
	1		1		1	0	0	0	0	0	0	0		1		14		1		0	0	0	0	0	1	1	1	1		1
	1		1		0	0	0	0	0	0	0	1	1			14		1		0	1	1	0	0	0	0	0	1			1
	1		1		1	0	0	0	0	0	0	0			1	14	1			1	0	0	0	0	0	0	0	1			1
	1			1	1	0	0	0	0	0	0	0			1	15			1	0	1	1	0	0	0	0	0	1			1
1			1		1	0	0	0	0	0	0	0			1	12			1	0	0	1	1	0	0	0	0	1		1
	1		1		0	1	0	0	0	0	0	0		1		7	1			1	0	1	0	0	0	1	1	1		1
1			1		0	1	0	0	0	0	0	0		1		11		1		1	0	1	1	1	0	1	1	1		1		0
	1		1		0	0	1	0	0	0	0	0	1			7			1	0	1	0	1	0	0	0	0	1		1		0
	1		1		0	1	0	0	0	0	0	0		1		9		1		1	0	1	1	1	0	1	1	1		1		0
	1		1		1	0	0	0	0	0	0	0			1	15			1	0	0	1	0	0	1	0	1	1		1
	1		1		1	0	0	0	0	0	0	0			1	15			1	0	0	0	1	0	0	0	0	1		1
	1		1		1	0	0	0	0	0	0	0		1		14		1		1	0	0	0	0	1	0	1	1		1
1			1		1	0	0	0	0	0	0	0			1	15			1	0	0	1	1	0	0	0	1	1			1
		1	1		0	1	0	0	0	0	0	0	1			12			1	0	0	0	1	0	0	0	0	1		1
	1		1		0	1	0	0	0	0	0	0		1		13	1			0	0		1	0	0	0	1	1		1
	1		1	0	0	1	0	0	0	0	0	0		1		15		1		0	1	1	0	0	0	0	0	1			1
	1		1	0	0	1	0	0	0	0	0	0			1	14	1			1	1	1	0	0	0	0	0	1			1
1			1		0	1	0	0	0	0	0	0		1		14		1		1	0	0	0	0	0	0	0	1			1
	1		1		1	0	0	0	0	0	0	0		1		15	1			1	1	1	0	0	0	1	1	1		1
	1			1	1	0	0	0	0	0	0	0		1		10		1		1	0	1	1	0	0	0	0	1		1
	1		1		0	0	0	0	0	0	0	1		1		14		1		1	0	0	0	1	0	0	0	1		1
		1	1		1	0	0	0	0	0	0	0		1		15		1		0	0	1	0	1	0	0	1	1		1
	1		1		1	0	0	0	0	0	0	0	1			14		1		0	0	0	1	0	0	1	0	1		1
	1			1		1							1			14			1	0	0	0	0	0	0	0	0		1		1
	1		1				1								1	14		1		0	1	1	0	0	0	0	0	1			1
	1		1			1								1		15	1			1	0	1	0	0	0	0	1	1			1
	1		1			1							1			14	1			0	1	1	0	0	0	0	0	1			1
	1		1								1			1		13			1	0	1	1	0	0	0	0	0	1			1
	1		1			1									1	3			1	0	0	1	0	0	0	0	1	0	1	1	0
1			1			1								1		15			1	0	1	1	0	0	0	0	0	1			1
1			1							1				1		14			1	0	1	1	0	1	0	0	1	1		1
	1		1			1								1		7			1	0	1	1	1	0	0	0	0	1		1
	1			1							1		1			14			1	0	1	1	0	0	0	0	1	1			1
		1	1				1							1		14			1	1	0	0	1	1	1	1	1		1	1
		1	1			1								1		14		1		0	1	1	0	0	0	0	0	1			1
	1		1		1									1		15			1	0	0	1	0	0	0	1	1	1		1
1			1		1									1		3	1			1	0	1	1	1	0	1	1	1		1
1			1			1							1			15			1	0	0	0	0	0	0	0	0		1		1
1			1		1									1		15			1	0	1	0	0	0	0	0	1	1			1
	1		1			1								1		15			1	0	1	1	0	1	0	0	1	1		1
	1		1		1										1	8			1	0	0	0	1	0	1	0	0	1		1
	1			1		1									1	14			1			0	1	0	1	1	1	1		1
1			1							1					1	14			1	0	1	1	0	0	0	0	1	1			1
		1	1			1									1	14			1	0	0	1	1	0	1	1	1	1		1
	1			1						1				1		14			1	1	0	0	0	0	1	0	1	1		1
	1		1		1									1		14	1			0	1	1	0	0	0	0	0	1			1
	1			1		1									1	14			1	0	0	0	0	0	0	0	0		1		1
1			1		1									1		14			1	0	1	0	0	0	0	1	0	1		1
	1		1		1								1			15			1	0	0	1	0	0	0	0	0	1			1
	1		1		1									1		15			1	0	0	1	0	0	0	1	0	1		1
	1		1		1									1		15			1	0	0	0	0	1	0	0	1		1	1
	1		1			1								1		14			1	0	1	1	0	0	0	0	1	1			1
	1		1		1										1	14	1			0	0	1	0	0	0	0	0	1			1
	1		1		1									1		15		1		0	1	1	0	0	0	0	1	1			1
		1	1								1				1	15			1	0	1	1	0	0	0	0	0	1			1
	1		1					1						1		14			1	0	1	1	0	0	0	0	0	1			1
	1		1		1										1	15			1	0	1	1						1			1
1			1			1								1		15			1	0	1	1						1			1
	1		1			1									1	15			1	0	1	1						1			1
		1	1			1									1	15			1	0	1	1						1			1
	1		1		1										1	15			1	0	0	1						1			1
	1		1		1									1		15			1	0	1	1						1			1
	1		1			1								1		15		1		0	1	1						1			1
	1		1								1			1		15		1		0	0	1					1	1			1
		1	1			1							1			14			1	0	1	0						1			1
	1		1			1								1		15		1		0	0	0	1	0	0	0	1	1		1
	1		1	0	1	0	0	0	0	0	0	0			1	14			1			0	0	1	1	0	0	1	0	1	0
	1		0	1	0	0	0	0	1	0	0	0	0	1	0	13			1	1	0	0	1	1	0	0	1		1	1
	1		1	0	1	0	0	0	0	0	0	0	0	1	0	3			1			1	0	0	0	1	1	1		1
	1		1	0	0	1	0	0	0	0	0	0	0	1	0	15			1	1		0	0					1			1
	1		1	0	1	0	0	0	0	0	0	0	1	0	0	15			1		1	0	0	0	0	0	0	1			1
	1		1	0	0	0	1	0	0	0	0	0	0	1	0	15			1	1		0	0	0	0	0	0	1			1
	1		0	1	1	0	0	0	0	0	0	0	1	0	0	15			1	1		0	0	0	0	0	0	1			1
1			1	0	0	1	0	0	0	0	0	0	1	0	0	14			1			1	0	0	0	0	0	1			1
	1		1	0	1	0	0	0	0	0	0	0	1	0	0	15			1			1	0	0	0	0	0	1		1
		1	1	0	0	0	0	1	0	0	0	0	0	1	0	13			1			1	1	1	0	1	1	1		1		1
	1		1	0	0	0	0	0	0	0	1	0	0	1	0	3	1	0	0	0	0	0	0	1	0	1	1	1	0	1	0	0
	1		1	0	0	1	0	0	0	0	0	0	0	1	0	14	0	1	0	1	0	1	0	0	0	0	1	1	0		1	0
	1		1	0	0	0	0	0	0	1	0	0	1	0	0	15	0	1	0	0	0	1	0	0	0	0	0	1	0		1
	1		1	0	1	0	0	0	0	0	0	0	0	1	0	11	0	0	1	0	0	1	1	1	0	0	1	1	0	1	0	0
		1	0	1	0	1	0	0	0	0	0	0	0	0	1	3	0	0	1	0	0	1	1	0	0	1	1	1	0	1	0	1
	1		1	0	0	0	0	0	0	1	0	0	0	0	1	14	0	1	0	1	0	1	0	0	0	0	1	1	0		1
	1		1	0	0	0	0	0	0	1	0	0	0	1	0	15	0	1	0	1	0	0	0	0	0	0	0	1	0		1	0
	1		1	0	0	0	0	0	0	0	1	0	0	1	0	7	1	0	0	0	0	1	0	1	0	1	1	1	0	1	0	1
1			0	1	0	0	0	0	0	1	0	0	0	1	0	14	0	0	1	0	0	1	1	0	1	0	1	1	0	1	0
	1		1	0	0	1	0	0	0	0	0	0	0	1	0	14	0	1	0	0	0	1	0	1	0	0	1	1	0	1	0	0
	1		1	0	0	0	0	0	0	0	0	1	0	1	0	14	0	1	0	0	0	1	0	0	0	1	1	1	0	1	0
1			1	0	0	0	0	1	0	0	0	0	0	1	0	4	1	0	0	0	0	0	1	0	0	1	1	1	0	1	0	0
	1		1	0	1	0	0	0	0	0	0	0	0	0	1	13	0	1	0	0	0	0	1	1	0	1	1	0	1	1	0
		1	1	0	0	0	0	0	0	0	1	0	0	1	0	11	0	1	0	0	0	1	1	1	0	1	1	1	0	1	0	0
	1		1	0	0	0	1	0	0	0	0	0	1	0	0	15	0	1	0	0	0	1	0	0	0	0	0	1	0		1	0
1			1	0	1	0	0	0	0	0	0	0	0	1	0	15	1	0	0	0	1	1	0	0	0	0	0	1	0		1	0
	1		1	0	0	0	0	0	0	1	0	0	1	0	0	15	0	0	1	0	1	0	0	0	0	0	0	1	0		1	0
	1		1	0	0	1	0	0	0	0	0	0	0	1	0	15	0	0	1	0	0	1	0	0	0	0	0	1	0		1	0
	1		0	1	0	1	0	0	0	0	0	0	0	1	0	15	0	1	0	1	0	0	0	0	0	0	0	1	0		1	0
	1		0	1	0	1	0	0	0	0	0	0	0	1	0	8	1	0	0	1	0	0	1	1	0	1	0	1	0	1	0	0
		1	1	0	0	0	1	0	0	0	0	0	1	0	0	15	0	1	0	1	0	0	0	0	0	0	0	1	0		1	0
1			1	0	1	0	0	0	0	0	0	0	0	0	1	14	0	1	0	0	1	1	0	0	0	0	0	1	0		1	0
		1	1	0	0	1	0	0	0	0	0	0	0	1	0	14	0	1	0	1	0	0	0	1	0	1	1	1	0	1	0	0
	1		0	1	0	0	1	0	0	0	0	0	0	1	0	15	0	1	0	0	0	1	0	0	0	0	0	1	0		1	0
	1		1	0	0	0	0	0	0	1	0	0	0	1	0	15	0	1	0	0	1	1	1	0	0	0	0	1	0	1	0	0
	1		1	0	1	0	0	0	0	0	0	0	0	1	0	15	0	1	0	0	1	0	0	0	0	0	0	1	0		1	0
	1		1	0	0	1	0	0	0	0	0	0	1	0	0	15	1	0	0	0	1	1	0	0	0	0	0	1	0		1	0
		1	1	0	0	0	0	0	0	0	1		1	0	0	14	0	1		1	0	1	0	0	0	0	0	1	0		1	0
	1		1	0	0	1	0	0	0	0	0	0	1	0	0	14	0	1	0	1	0	0	0	0	0	0	0	1	0		1	0
	1		1	0	1	0	0	0	0	0	0	0	0	1	0	14	1	0	0	0	0	1	0	0	0	0	0	1	0		1	0
	1		1	0	0	1	0	0	0	0	0	0	0	0	1	8	0	1	0	0	0	0	1		0	1	1	0	1	1	0	0
	1		0	1	0	1	0	0	0	0	0	0	0	0	1	15	0	1	0		1	1	0	0	0	0	0	1	0		1	0
	1		1	0	0	1	0	0	0	0	0	0	0	1	0	15	0	1	0	1	0	0	0	1	0	0	1	1	0	1	0	0
1			1	0	1	0	0	0	0	0	0	0	0	1	0	14	0	1	0		1	1	0	0	0	0	1	1	0		1	0
	1		1	0	0	0	0	0	0	0	1	0	0	0	1	14	0	0	1	0	0	0	1	0	0	1	1	1	0	1	0	0
	1		1	0	0	0	0	0	0	1	0	0	0	0	1	15	0	1	0	0	1	1	0	0	0	0	1	1	0		1	0
	1		1	0	0	1	0	0	0	0	0	0	1	0	0	15	0	1	0	0	0	0	0	0	0	0	1	1	0		1	0
